# Supplementary material for: Genome-Wide Association Study Confirming Association of HLA-DP with Protection against Chronic Hepatitis B and Viral Clearance in Japanese and Korean
Source: PLoS One. 2012 Jun 21;7(6):e39175. doi: 10.1371/journal.pone.0039175 (PMC3380898; doi:10.1371/journal.pone.0039175)
Supplement: Table S1 — Results for 29 SNPs selected in replication study using samples of HBV carriers and healthy controls. a P values by chi-squared test for allelic model. bOdds ratio of minor allele from two-by-two allele frequency table. cMeta-analysis was tested using additive, two-tailed CMH fixed-effects model. (XLSX) [file pone.0039175.s005.xlsx]

## Sheet: HBV vs Healthy
dbSNP RS ID	Chr	Gene	GWAS			Replication-1			Replication-2			Combine			Meta analysis
			p-valuea	ORb		p-valuea	ORb		p-valuea	ORb		p-valuea	ORb		p-valuec	ORc
rs4845895	1	TNFRSF8	0.0293	0.7157		0.11	0.8127		0.4385	0.8853		0.0077	0.8007
rs7528035	1	CAPZB	0.0008	0.2726		0.9626	1.0125		0.5638	0.6655		0.011	0.5743
rs2034693	2	LTBP1	0.0616	0.751		0.0832	0.7988		0.7295	0.9466		0.0174	0.8198
rs2717038	2	FANCL	0.0002	0.568		0.2946	1.1446		0.9387	1.0119		0.2615	0.9118
rs9276431	6	---	0.027	0.6158		5.47114e-05	0.4987		0.0143	0.6108		4.74383e-07	0.5694		2.79717e-07	0.561358
rs7768538	6	HLA-DQB2	0.0058	0.5228		6.75235e-05	0.4861		0.0209	0.614		1.87498e-07	0.541		1.09412e-07	0.532538
rs3077	6	HLA-DPA1	1.14051e-07	0.4165		2.70116e-08	0.4759		2.08296e-06	0.4746		1.13752e-18	0.4686		2.16357e-19	0.458239
rs1431403	6	HLA-DPB1	3.82343e-06	0.4712		1.20815e-07	0.4955		2.90866e-05	0.5167		8.97418e-16	0.5023		3.25784e-16	0.494577
rs9277542	6	HLA-DPB1	5.32283e-08	0.4197		3.33254e-06	0.5422		8.29059e-05	0.5421		3.98214e-15	0.5155		7.68121e-16	0.50406
rs12195525	6	NOX3	0.2012	1.2854		0.4962	0.8838		0.5618	1.148		0.7433	1.0389
rs705944	6	TULP4	0.3602	0.8714		0.0185	0.7361		0.9498	1.0097		0.0325	0.8384
rs1041566	6	TULP4	0.1183	0.792		0.3795	0.8934		0.6276	1.078		0.1715	0.894
rs887939	7	NXPH1	0.0162	0.5512		0.9561	0.9901		0.1	0.6913		0.0393	0.7784
rs12671170	7	7A5	0.0138	2.9115		0.2087	1.4047		0.4824	1.2436		0.0303	1.4821
rs4719763	7	NPY	0.7784	1.0481		0.578	0.9262		0.974	0.9947		0.7284	0.9697
rs16926137	8	RAB2A	0.0927	0.752		0.7997	0.9654		0.0666	0.7279		0.0378	0.8279
rs10112966	8	PYCRL	0.0005	1.6974		0.9694	0.9951		0.0292	1.4098		0.0024	1.2865
rs13300111	9	KIAA0020	0.0135	1.5018		0.2423	0.8446		0.3969	1.174		0.4286	1.0768
rs3808728	9	SH3GL2	0.6555	0.8874		0.2728	1.3244		0.3913	1.3437		0.3104	1.1798
rs12218675	10	MKI67	0.0042	0.4768		0.9812	1.0048		0.2878	0.7595		0.0356	0.7537
rs16908990	10	MKI67	0.0431	0.5773		0.8464	1.0407		0.6298	0.881		0.2443	0.8512
rs12315364	12	LRRC23	0.3376	0.8351		0.7995	0.9614		0.4178	1.1524		0.9662	1.0042
rs2810442	13	KCTD12	0.9818	1.0038		0.1522	1.219		0.7704	0.9524		0.4129	1.0758
rs7194732	16	ERCC4	0.3855	1.1501		0.9591	0.9931		0.1423	0.7928		0.5496	0.95
rs1476512	17	SLC4A1	0.0939	0.7556		0.5888	0.9236		0.2647	1.2095		0.4829	0.9371
rs10514170	18	LOC284274	0.1203	1.2864		0.1744	0.8171		0.2432	1.2324		0.5925	1.0509
rs6077908	20	JAG1	0.0189	0.6885		0.9627	1.0063		0.9872	0.9975		0.2541	0.9069
rs2027625	21	C21orf34	0.0245	1.3993		0.2251	1.1688		0.4013	1.1387		0.0106	1.2337
