# Supplementary material for: Genome-Wide Association Study Confirming Association of HLA-DP with Protection against Chronic Hepatitis B and Viral Clearance in Japanese and Korean
Source: PLoS One. 2012 Jun 21;7(6):e39175. doi: 10.1371/journal.pone.0039175 (PMC3380898; doi:10.1371/journal.pone.0039175)
Supplement: Table S2 — Results of meta-analysis for protective effects against persistent HB infection across 6 independent studies, including this study. aMinor allele frequency and minor allele in 198 healthy Japanese (ref#19). bOdds ratio of minor allele from two-by-two allele frequency table. c P value of Pearson’s chi-squared test for allele model. dHeterogeneity was tested using general variance-based method. eMeta-analysis was tested using the random effects model. (XLSX) [file pone.0039175.s006.xlsx]

## Sheet: HBV vs CTRL
			MAFa	Allele		Stage	HBV patients				Healthy controls				ORb	P-valuec	Phetd
	dbSNP rsID	Nearest Gene	(allele)	(1/2)		(population)	11	12	22	Freq allele 1	11	12	22	Freq allele 1	95% CI
	rs3077	HLA-DPA1	0.44	T/C		Japanese	39	146	251	0.256881	74	213	132	0.430788	0.46	3.51×10-14
			(T)			(this study)	(8.9)	(33.5)	(57.6)		(17.7)	(50.8)	(31.5)		(0.37-0.56)
						Korean	23	81	111	0.295349	31	74	40	0.468966	0.47	2.08×10-6
						(this study)	(10.7)	(37.7)	(51.6)		(21.4)	(51.0)	(27.6)		(0.35-0.65)
						Japanese	231	965	1473	0.267329	1066	3100	2330	0.402709	0.54	3.66×10-67
						(ref#11)	(8.7)	(36.2)	(55.2)		(16.4)	(47.7)	(35.9)		(0.50-0.58)
						Thai	28	109	163	0.275	85	250	210	0.385321	0.61	5.07×10-6
						(ref#10)	(9.3)	(36.3)	(54.3)		(15.6)	(45.9)	(38.5)		(0.49-0.75)
						Han Chinese (north)	56	211	247	0.314202	167	382	259	0.443069	0.58	3.75×10-11
						(ref#13)	(10.9)	(41.0)	(48.1)		(20.7)	(47.3)	(32.1)		(0.49-0.68)
						Han Chinese (north)	113	485	620	0.291872	35	103	83	0.391403	0.64	3.00×10-5
						(ref#16)	(9.3)	(39.8)	(50.9)		(15.8)	(46.6)	(37.6)		(0.52-0.79)
						Meta-analysise									0.55	3.94×10-45	0.2
															(0.51-0.60)
	rs9277535	HLA-DPB1	0.44	A/G		Japanese	273	1042	1353	0.297601	1209	3170	2118	0.430045	0.56	1.57×10-62
			(A)			(ref#11)	(10.2)	(39.1)	(50.7)		(18.6)	(48.8)	(32.6)		(0.52-0.60)
						Thai	29	136	139	0.319079	107	273	155	0.45514	0.56	4.88×10-8
						(ref#10)	(9.5)	(44.7)	(45.7)		(20.0)	(51.0)	(29.0)		(0.46-0.69)
						Han Chinese (north)	118	287	206	0.427987	97	203	80	0.522368	0.68	4.19×10-5
						(ref#12)	(19.3)	(47.0)	(33.7)		(25.5)	(53.4)	(21.1)		(0.57-0.82)
						Han Chinese (south)	177	830	1195	0.268847	80	277	216	0.381326	0.6	8.69×10-14
						(ref#12)	(8.0)	(37.7)	(54.3)		(14.0)	(48.3)	(37.7)		(0.52-0.68)
						Han Chinese (north)	98	217	183	0.414659	266	364	164	0.564232	0.55	1.34×10-13
						(ref#13)	(19.7)	(43.6)	(36.7)		(33.5)	(45.8)	(20.7)		(0.47-0.64)
						Han Chinese (north)	252	546	395	0.440067	61	100	63	0.495536	0.8	3.03×10-2
						(ref#16)	(21.1)	(45.8)	(33.1)		(27.2)	(44.6)	(28.1)		(0.65-0.98)
						Meta-analysise									0.61	1.74×10-21	0.01
															(0.55-0.68)
	rs9277542	HLA-DPB1	0.45	T/C		Japanese	48	159	228	0.293103	83	216	119	0.456938	0.49	2.68×10-12
			(T)			(this study)	(11.0)	(36.6)	(52.4)		(19.9)	(51.7)	(28.5)		(0.40-0.60)
						Korean	30	87	94	0.348341	35	72	36	0.496503	0.54	8.29×10-5
						(this study)	(14.2)	(41.2)	(44.5)		(24.5)	(50.3)	(25.2)		(0.40-0.74)
						Meta-analysise									0.51	1.69×10-15	0.61
															(0.43-0.60)
