# Supplementary material for: Genome-Wide Association Study Confirming Association of HLA-DP with Protection against Chronic Hepatitis B and Viral Clearance in Japanese and Korean
Source: PLoS One. 2012 Jun 21;7(6):e39175. doi: 10.1371/journal.pone.0039175 (PMC3380898; doi:10.1371/journal.pone.0039175)
Supplement: Table S4 — Results of meta-analysis for clearance of HBV across 6 independent studies, including this study. aMinor allele frequency and minor allele in 198 healthy Japanese (ref#19). bOdds ratio of minor allele from two-by-two allele frequency table. c P value of Pearson’s chi-squared test for allele model. dHeterogeneity was tested using general variance-based method. eMeta-analysis was tested using the random effects model. (XLSX) [file pone.0039175.s008.xlsx]

## Sheet: Table S4
			MAFa	Allele		Stage	HBV patients				Resolved individuals				ORb
	dbSNP rsID	Nearest Gene	(allele)	(1/2)		(population)	11	12	22	Freq allele 1	11	12	22	Freq allele 1	95% CI	P-valuec	Phetd
	rs3077	HLA-DPA1	0.44	T/C		Japanese	39	146	251	0.256881	49	146	134	0.370821	0.59	1.68×10-6
			(T)			(this study)	(8.9)	(33.5)	(57.6)		(14.9)	(44.4)	(40.7)		(0.47-0.73)
						Korean	23	81	111	0.295349	29	48	28	0.504762	0.41	2.35×10-7
						(this study)	(10.7)	(37.7)	(51.6)		(27.6)	(45.7)	(26.7)		(0.29-0.58)
						Han Chinese (north)	56	211	247	0.314202	120	262	180	0.446619	0.57	2.78×10-10
						(ref#13)	(10.9)	(41.1)	(48.1)		(21.4)	(46.6)	(32.0)		(0.48-0.68)
						Han Chinese (north)	113	485	620	0.291872	41	160	86	0.421603	0.57	1.84×10-9
						(ref#16)	(9.3)	(39.8)	(50.9)		(14.3)	(55.7)	(30.0)		(0.47-0.68)
						Han Chinese (north)	69	276	391	0.28125	149	371	262	0.427749	0.52	3.71×10-17
						(ref#17)	(9.4)	(37.5)	(53.1)		(19.1)	(47.4)	(33.5)		(0.45-0.61)
						Han Chinese (south)	8	54	115	0.19774	15	68	125	0.235577	0.8	0.21
						(ref#17)	(4.5)	(30.5)	(65.0)		(7.2)	(32.7)	(60.1)		(0.57-1.13)
						Han Chinese (southeast)	206	1008	1413	0.27027	143	570	615	0.322289	0.78	1.39×10-6
						(ref#18)	(7.8)	(38.4)	(53.8)		(10.8)	(42.9)	(46.3)		(0.70-0.86)
						Meta-analysise									0.6	1.48×10-9	9.57×10-6
															(0.50-0.70)
						Meta-analysise									0.56	5.88×10-24	0.1453
						(exclude ref#18)									(0.50-0.63)
	rs9277535	HLA-DPB1	0.44	A/G		Han Chinese (north)	118	287	206	0.427987	67	165	75	0.486971	0.79	0.017
			(A)			(ref#12)	(19.3)	(47.0)	(33.7)		(21.8)	(53.7)	(24.4)		(0.65-0.96)
						Han Chinese (south)	177	830	1195	0.268847	67	251	208	0.36597	0.64	4.03×10-10
						(ref#12)	(8.0)	(37.7)	(54.3)		(12.7)	(47.7)	(39.5)		(0.55-0.73)
						Han Chinese (north)	98	217	183	0.414659	193	256	104	0.58047	0.51	3.16×10-14
						(ref#13)	(19.7)	(43.6)	(36.7)		(34.9)	(46.3)	(18.8)		(0.43-0.61)
						Han Chinese (north)	252	546	395	0.440067	81	127	73	0.514235	0.74	1.49×10-3
						(ref#16)	(21.1)	(45.8)	(33.1)		(28.8)	(45.2)	(26.0)		(0.62-0.89)
						Han Chinese (north)	98	332	306	0.358696	155	388	239	0.446292	0.69	8.83×10-7
						(ref#17)	(13.3)	(45.1)	(41.6)		(19.8)	(49.6)	(30.6)		(0.60-0.80)
						Han Chinese (south)	10	63	104	0.234463	26	89	93	0.338942	0.6	1.47×10-3
						(ref#17)	(5.6)	(35.6)	(58.8)		(12.5)	(42.8)	(44.7)		(0.43-0.82)
						Han Chinese (southeast)	321	1155	1152	0.341895	249	668	421	0.435725	0.67	3.14×10-16
						(ref#18)	(12.2)	(43.9)	(43.8)		(18.6)	(49.9)	(31.5)		(0.61-0.74)
						Meta-analysise									0.66	1.08×10-17	0.03
															(0.60-0.73)
	rs9277542	HLA-DPB1	0.45	T/C		Japanese	48	159	228	0.293103	56	150	121	0.400612	0.62	1.15×10-5
			(T)			(this study)	(11.0)	(36.6)	(52.4)		(12.9)	(34.5)	(27.8)		(0.50-0.77)
						Korean	30	87	94	0.348341	30	53	22	0.538095	0.46	4.97×10-6
						(this study)	(14.2)	(41.2)	(44.5)		(28.6)	(50.5)	(21.0)		(0.33-0.64)
						Meta-analysise									0.55	5.14×10-5	0.14
															(0.41-0.73)
