# Supplementary material for: Genome-Wide Association Study Confirming Association of HLA-DP with Protection against Chronic Hepatitis B and Viral Clearance in Japanese and Korean
Source: PLoS One. 2012 Jun 21;7(6):e39175. doi: 10.1371/journal.pone.0039175 (PMC3380898; doi:10.1371/journal.pone.0039175)
Supplement: Table S5 — Logistic regression analysis of HLA-DP (rs3077 and rs9277542) and HLA-DQ (rs9276431 and rs7768538) with susceptibility to CHB and HBV clearance using the HLA-DQ genotypes individually as a covariate. (XLSX) [file pone.0039175.s009.xlsx]

## Sheet: Sheet1
HBV patients vs Healthy controls
			rs3077				rs9277542
		covariate	#sample	Plog	OR		#sample	Plog	OR
	Japanese	rs9276431	852	2.92152e-13	0.22		852	1.56988e-11	0.26
		rs7768538	850	3.06974e-13	0.22		850	1.58737e-11	0.26
	Korean	rs9276431	353	3.72626e-06	0.23		353	0.000103601	0.3
		rs7768538	349	2.33262e-06	0.23		349	0.000169372	0.31
HBV patients vs HBV resolved individuals
			rs3077				rs9277542
		covariate	#sample	Plog	OR		#sample	Plog	OR
	Japanese	rs9276431	764	6.87934e-06	0.38		764	3.35135e-05	0.42
		rs7768538	753	3.46887e-06	0.36		753	1.95625e-05	0.4
	Korean	rs9276431	313	1.4517e-06	0.2		313	1.09776e-05	0.22
		rs7768538	309	9.3159e-07	0.19		309	1.80078e-05	0.23
